# Supplementary material for: Self-assembled nucleo-tripeptide hydrogels provide local and sustained doxorubicin release
Source: Royal Society of Chemistry journal article supplement (doi:10.1039/d0bm00134a), 2020-01-01
Supplement: d0bm00134a1.pdf [file d0bm00134a1.pdf]

## Supporting Information

### Self-assembled nucleo-tripeptide hydrogels provide local and sustained doxorubicin release

*Kiheon Baek, Alexander David Noblett, Pengyu Ren, and Laura J. Suggs\**

Department of Biomedical Engineering, The University of Texas at Austin, 107 W Dean Keeton St, Austin, TX, 78712

#### Supplementary Figures:

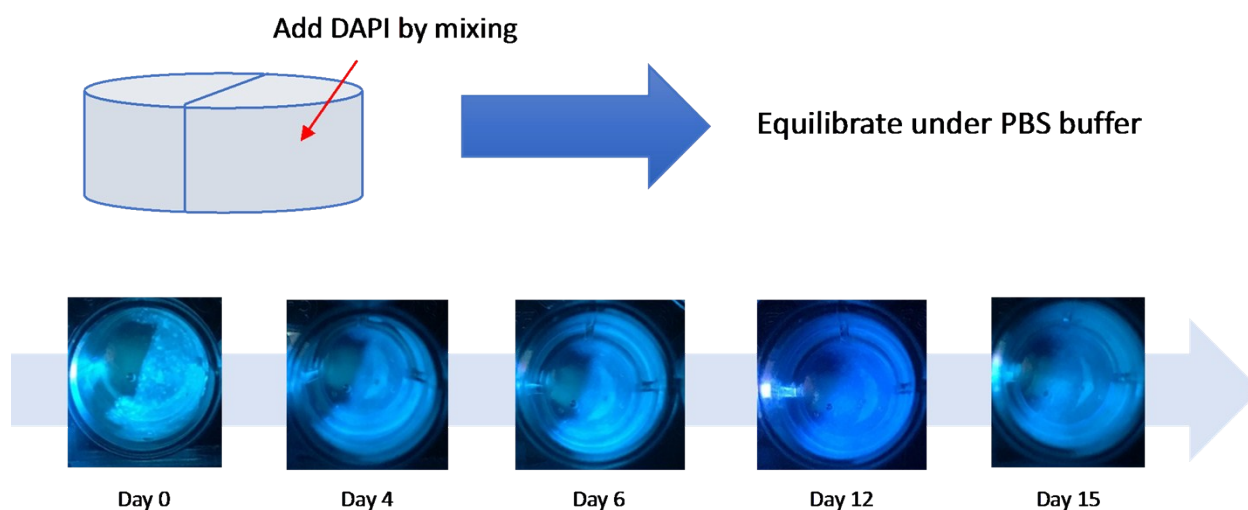

**Figure S1.** Ade-FFF hydrogel having DAPI on its right hemisphere regions showed slow diffusion of DAPI in the hydrogel.

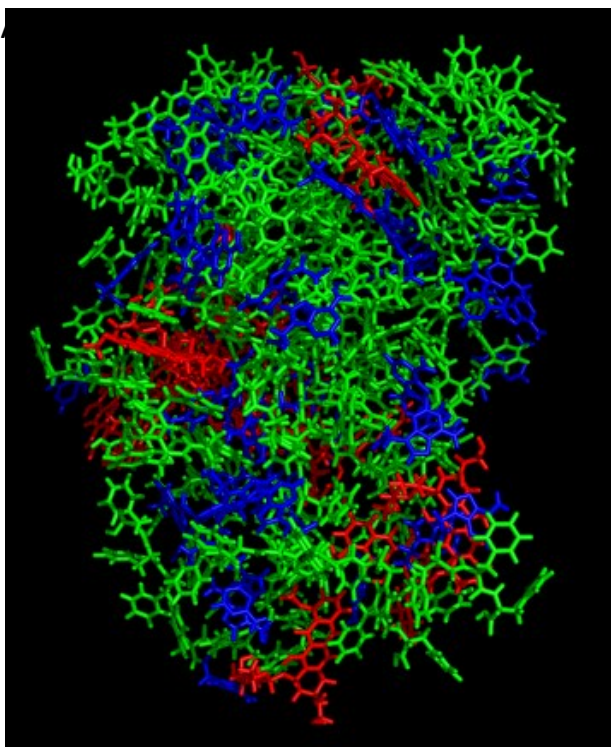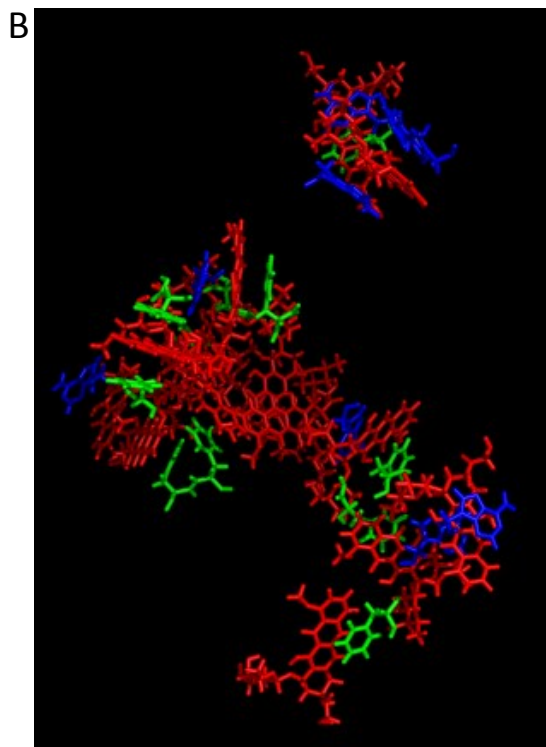

**Figure S2.** (A) Self-assembled Ade-FFF with doxorubicin after 55 ns of simulated annealing molecular dynamics simulation and 5 ns of equilibration. (B) Doxorubicin molecules and residues forming  $\pi$ - $\pi$  interactions in assembled structure. (Red: DOX, blue: ADL, green: PHE)

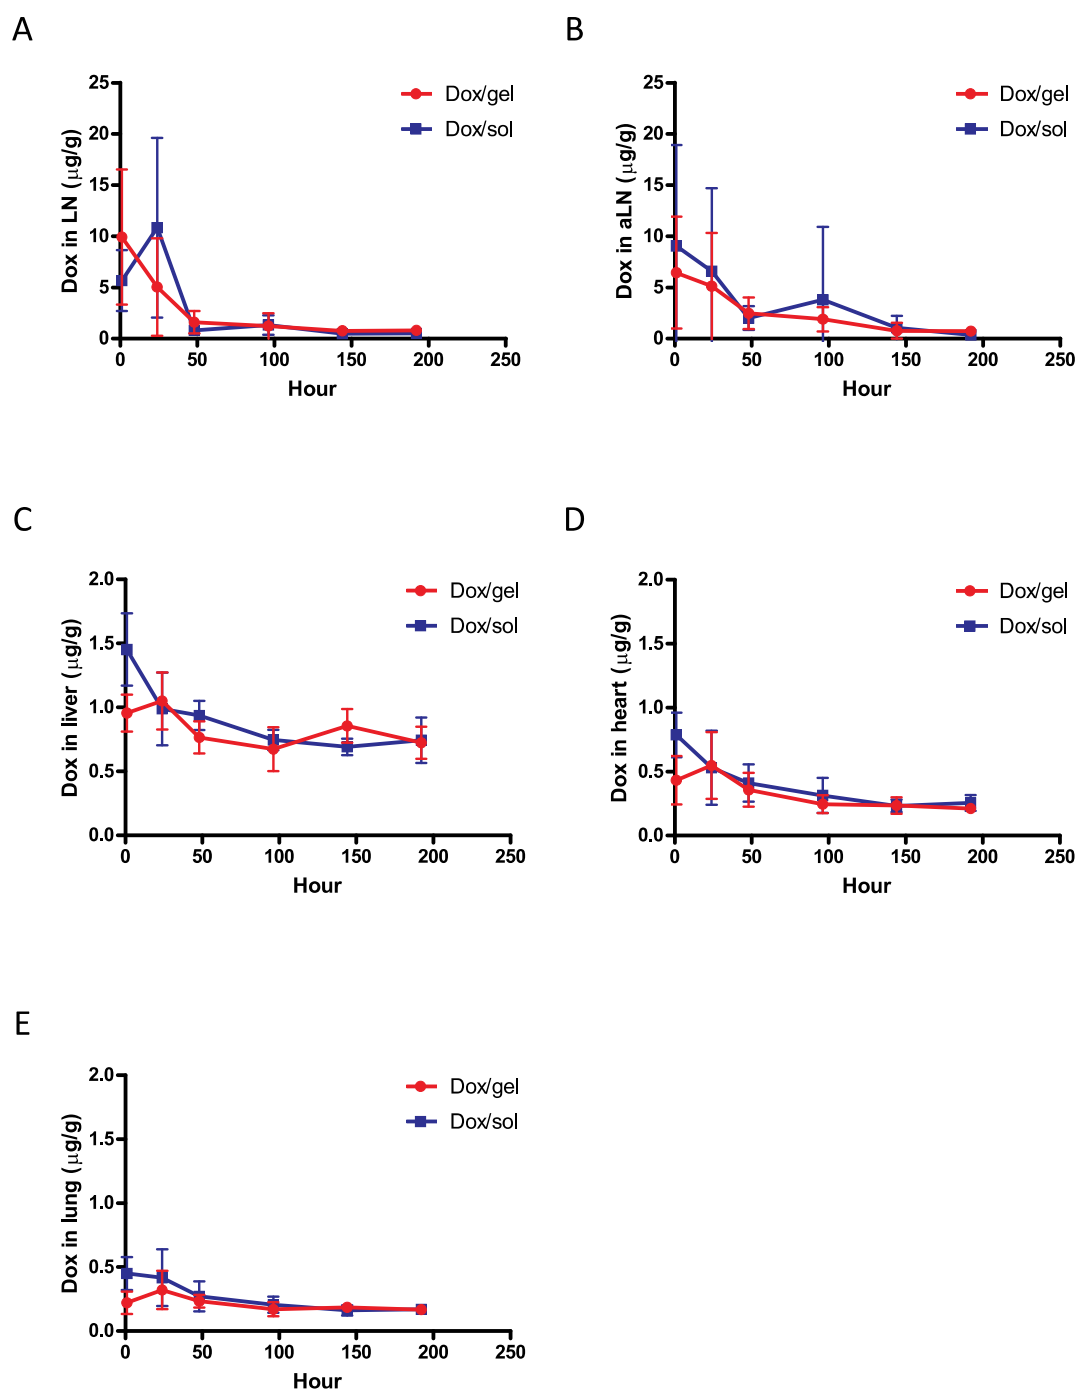

**Figure S3.** Biodistribution profile of doxorubicin in (A) lymph node (LN), (B) axillary LN, (C) liver, (D) heart, and (E) lung.

A

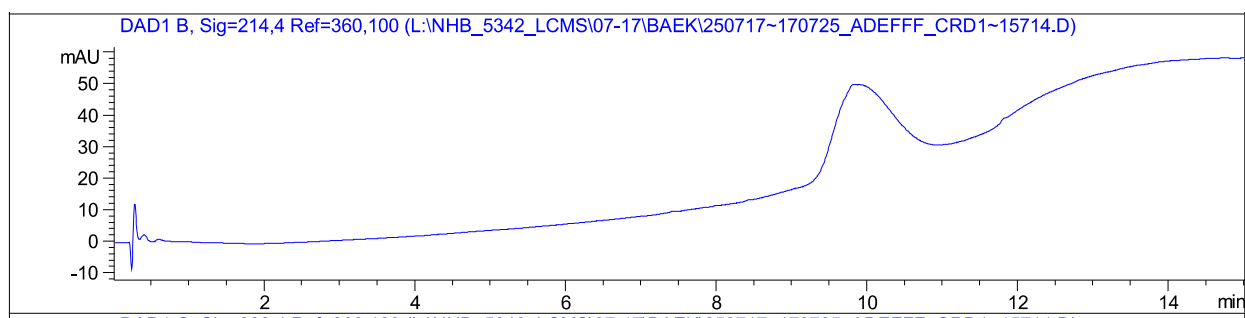

B

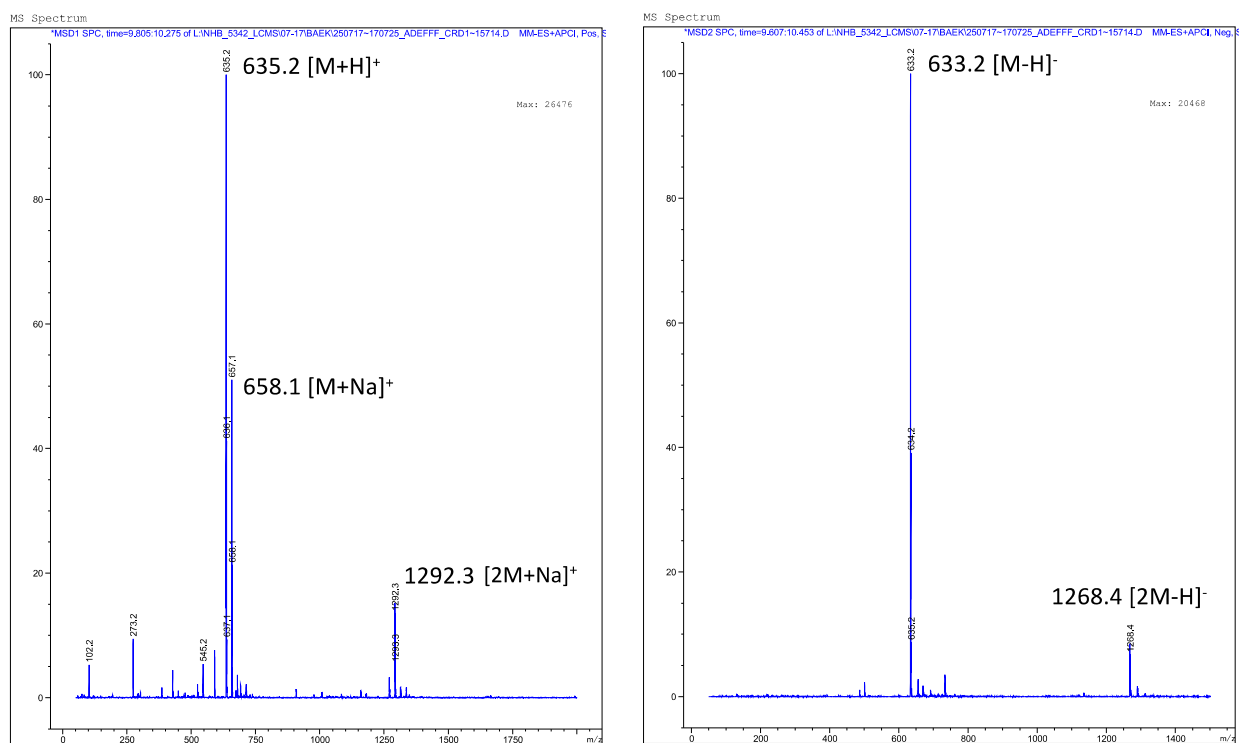

**Figure S4.** LC/MS analysis of Ade-FFF. (A) HPLC profile and (B) MS peak profiles of Ade-FFF peak (left for positive and right for negative mode).
